# Supplementary material
Source: PubMed Central journal article supplement (PMC6990752)
Supplement: jamainternmed-180-367-s001.pdf [file jamainternmed-180-367-s001.pdf]

## Supplementary Online Content

Bao W, Liu B, Simonsen DW, Lehmler H-J. Association between exposure to pyrethroid insecticides and risk of all-cause and cause-specific mortality in the general US adult population. *JAMA Intern Med*. Published December 30, 2019.  
doi:10.1001/jamainternmed.2019.6019

**eTable 1.** Detection Rates of Other Metabolites of Pyrethroids, NHANES 1999-2002

**eTable 2.** Urinary 3-Phenoxybenzoic Acid Levels (ng/mL), According to Population Characteristics

**eTable 3.** Creatinine-Adjusted Urinary 3-Phenoxybenzoic Acid Levels ( $\mu\text{g/g}$  Creatinine), According to Population Characteristics

This supplementary material has been provided by the authors to give readers additional information about their work.

**eTable 1.** Detection Rates of Other Metabolites of Pyrethroids, NHANES 1999-2002

| <b>Metabolites</b> | <b>Detection rate</b> |
|--------------------|-----------------------|
| cis-DCCA           | 39.1%                 |
| trans-DCCA         | 28.0%                 |
| 4F-PBA             | 1.2%                  |
| cis-DBCA           | 0.7%                  |

Abbreviations: cis-DCCA, cis-3-(2,2-dichlorovinyl)-2,2-dimethylcyclopropane carboxylic acid; trans-DCCA, trans-3-(2,2-dichlorovinyl)-2,2-dimethylcyclopropane carboxylic acid; 4F-PBA, 4-fluoro-3-phenoxybenzoic acid; cis-DBCA, cis-(2,2-dibromovinyl)-2,2-dimethylcyclopropane-1-carboxylic acid.

**eTable 2.** Urinary 3-Phenoxybenzoic Acid Levels (ng/mL), According to Population Characteristics

| Characteristics                | Geometric mean<br>(95% confidence interval) | Selected percentile (95% confidence interval) |                  |                  |                  |       |
|--------------------------------|---------------------------------------------|-----------------------------------------------|------------------|------------------|------------------|-------|
|                                |                                             | Min                                           | 25th             | 50th             | 75th             | Max   |
| Sex                            |                                             |                                               |                  |                  |                  |       |
| Male                           | 0.28 (0.26-0.31)                            | 0.07                                          | 0.07 (0.04-0.10) | 0.24 (0.19-0.29) | 0.63 (0.55-0.72) | 69.07 |
| Female                         | 0.29 (0.26-0.32)                            | 0.07                                          | 0.07 (0.04-0.10) | 0.23 (0.19-0.27) | 0.63 (0.52-0.74) | 58.89 |
| Race/ethnicity                 |                                             |                                               |                  |                  |                  |       |
| Hispanic                       | 0.25 (0.23-0.28)                            | 0.07                                          | 0.07 (0.04-0.10) | 0.22 (0.18-0.25) | 0.56 (0.43-0.69) | 58.69 |
| Non-Hispanic white             | 0.27 (0.24-0.30)                            | 0.07                                          | 0.07 (0.04-0.10) | 0.21 (0.17-0.26) | 0.55 (0.45-0.65) | 69.07 |
| Non-Hispanic black             | 0.50 (0.44-0.58)                            | 0.07                                          | 0.22 (0.16-0.27) | 0.53 (0.45-0.62) | 0.99 (0.75-1.23) | 40.63 |
| Other                          | 0.26 (0.20-0.34)                            | 0.07                                          | 0.07 (0.01-0.13) | 0.19 (0.08-0.31) | 0.73 (0.37-1.09) | 36.32 |
| Education                      |                                             |                                               |                  |                  |                  |       |
| Less than high school          | 0.36 (0.31-0.41)                            | 0.07                                          | 0.12 (0.06-0.17) | 0.34 (0.27-0.41) | 0.75 (0.61-0.88) | 58.89 |
| High school                    | 0.27 (0.24-0.31)                            | 0.07                                          | 0.07 (0.04-0.10) | 0.24 (0.19-0.28) | 0.60 (0.49-0.72) | 58.89 |
| College or higher              | 0.27 (0.24-0.30)                            | 0.07                                          | 0.07 (0.04-0.10) | 0.20 (0.16-0.25) | 0.57 (0.47-0.67) | 69.07 |
| Family income to poverty ratio |                                             |                                               |                  |                  |                  |       |
| <1.3                           | 0.29 (0.25-0.34)                            | 0.07                                          | 0.07 (0.03-0.11) | 0.29 (0.21-0.36) | 0.60 (0.46-0.74) | 58.69 |
| 1.3-3.5                        | 0.32 (0.30-0.35)                            | 0.07                                          | 0.07 (0.04-0.10) | 0.26 (0.22-0.29) | 0.72 (0.61-0.83) | 69.07 |
| >3.5                           | 0.25 (0.22-0.28)                            | 0.07                                          | 0.07 (0.04-0.10) | 0.18 (0.14-0.23) | 0.53 (0.42-0.63) | 58.89 |
| Missing                        | 0.32 (0.26-0.40)                            | 0.07                                          | 0.11 (0.08-0.13) | 0.32 (0.21-0.43) | 0.75 (0.57-0.93) | 12.28 |
| Smoking                        |                                             |                                               |                  |                  |                  |       |
| Never smoker                   | 0.27 (0.24-0.30)                            | 0.07                                          | 0.07 (0.04-0.10) | 0.22 (0.18-0.26) | 0.60 (0.50-0.70) | 58.69 |

|                              |                  |      |                   |                  |                   |       |
|------------------------------|------------------|------|-------------------|------------------|-------------------|-------|
| Ever smoker                  | 0.33 (0.30-0.37) | 0.07 | 0.07 (0.04-0.10)  | 0.29 (0.23-0.35) | 0.76 (0.64-0.88)  | 69.07 |
| Current smoker               | 0.27 (0.24-0.30) | 0.07 | 0.07 (0.05-0.09)  | 0.21 (0.16-0.26) | 0.55 (0.41-0.69)  | 36.32 |
| Alcohol drinking             |                  |      |                   |                  |                   |       |
| Non-drinker                  | 0.28 (0.26-0.31) | 0.07 | 0.07 (0.04-0.10)  | 0.23 (0.19-0.27) | 0.61 (0.52-0.71)  | 69.07 |
| Moderate drinking            | 0.29 (0.24-0.37) | 0.07 | 0.07 (0.03-0.11)  | 0.26 (0.15-0.38) | 0.73 (0.52-0.94)  | 21.05 |
| Heavy drinking               | 0.27 (0.24-0.31) | 0.07 | 0.07 (0.05-0.09)  | 0.24 (0.19-0.28) | 0.61 (0.48-0.74)  | 17.27 |
| Missing                      | 0.36 (0.23-0.55) | 0.07 | 0.07 (-0.04-0.18) | 0.29 (0.04-0.55) | 0.93 (0.28-1.58)  | 36.32 |
| Physical activity categories |                  |      |                   |                  |                   |       |
| Below                        | 0.30 (0.27-0.34) | 0.07 | 0.07 (0.04-0.10)  | 0.27 (0.23-0.32) | 0.70 (0.59-0.81)  | 58.89 |
| Meet                         | 0.25 (0.21-0.29) | 0.07 | 0.07 (0.03-0.11)  | 0.19 (0.14-0.24) | 0.52 (0.39-0.66)  | 58.89 |
| Exceed                       | 0.28 (0.25-0.32) | 0.07 | 0.07 (0.04-0.10)  | 0.22 (0.15-0.28) | 0.62 (0.52-0.71)  | 69.07 |
| BMI categories               |                  |      |                   |                  |                   |       |
| <25 kg/m <sup>2</sup>        | 0.29 (0.26-0.32) | 0.07 | 0.07 (-0.04-0.10) | 0.24 (0.19-0.29) | 0.64 (0.49-0.79)  | 57.22 |
| 25-29.9 kg/m <sup>2</sup>    | 0.25 (0.21-0.29) | 0.07 | 0.07 (0.04-0.10)  | 0.20 (0.15-0.26) | 0.57 (0.40-0.73)  | 58.89 |
| ≥30 kg/m <sup>2</sup>        | 0.32 (0.29-0.35) | 0.07 | 0.07 (0.04-0.10)  | 0.27 (0.23-0.32) | 0.69 (0.61-0.77)  | 69.07 |
| Missing                      | 0.31 (0.21-0.46) | 0.07 | 0.07 (0.02-0.12)  | 0.26 (0.15-0.37) | 0.47 (-0.67-1.62) | 11.97 |

**eTable 3.** Creatinine-Adjusted Urinary 3-Phenoxybenzoic Acid Levels ( $\mu\text{g/g}$  Creatinine), According to Population Characteristics

| Characteristics                   | Geometric mean<br>(95% confidence<br>interval) | Selected percentile (95% confidence interval) |                  |                  |                  |       |
|-----------------------------------|------------------------------------------------|-----------------------------------------------|------------------|------------------|------------------|-------|
|                                   |                                                | Min                                           | 25th             | 50th             | 75th             | Max   |
| Sex                               |                                                |                                               |                  |                  |                  |       |
| Male                              | 0.22 (0.20-0.24)                               | 0.02                                          | 0.09 (0.08-0.11) | 0.20 (0.18-0.22) | 0.41 (0.36-0.47) | 32.32 |
| Female                            | 0.36 (0.33-0.39)                               | 0.02                                          | 0.17 (0.14-0.19) | 0.32 (0.28-0.35) | 0.65 (0.54-0.76) | 75.2  |
| Race/ethnicity                    |                                                |                                               |                  |                  |                  |       |
| Hispanic                          | 0.22 (0.19-0.24)                               | 0.02                                          | 0.09 (0.08-0.11) | 0.20 (0.17-0.23) | 0.41 (0.34-0.47) | 75.24 |
| Non-Hispanic white                | 0.28 (0.26-0.31)                               | 0.02                                          | 0.13 (0.11-0.14) | 0.26 (0.24-0.29) | 0.53 (0.45-0.62) | 43.62 |
| Non-Hispanic black                | 0.36 (0.31-0.42)                               | 0.02                                          | 0.16 (0.13-0.20) | 0.35 (0.29-0.40) | 0.68 (0.51-0.85) | 22.39 |
| Other                             | 0.33 (0.26-0.41)                               | 0.02                                          | 0.15 (0.10-0.21) | 0.27 (0.20-0.34) | 0.63 (0.40-0.86) | 23.28 |
| Education                         |                                                |                                               |                  |                  |                  |       |
| Less than high school             | 0.33 (0.30-0.37)                               | 0.02                                          | 0.16 (0.14-0.18) | 0.30 (0.25-0.35) | 0.62 (0.53-0.71) | 31.64 |
| High school                       | 0.29 (0.25-0.32)                               | 0.02                                          | 0.13 (0.11-0.15) | 0.28 (0.24-0.32) | 0.52 (0.42-0.62) | 75.24 |
| College or higher                 | 0.27 (0.24-0.29)                               | 0.02                                          | 0.11 (0.10-0.13) | 0.24 (0.21-0.27) | 0.52 (0.45-0.60) | 32.33 |
| Family income to poverty<br>ratio |                                                |                                               |                  |                  |                  |       |
| <1.3                              | 0.29 (0.26-0.33)                               | 0.02                                          | 0.14 (0.10-0.18) | 0.28 (0.24-0.33) | 0.53 (0.45-0.61) | 75.24 |
| 1.3-3.5                           | 0.31 (0.29-0.33)                               | 0.02                                          | 0.14 (0.12-0.15) | 0.28 (0.25-0.31) | 0.58 (0.46-0.69) | 32.33 |
| >3.5                              | 0.26 (0.23-0.29)                               | 0.02                                          | 0.11 (0.09-0.13) | 0.24 (0.21-0.26) | 0.50 (0.42-0.58) | 43.62 |
| Missing                           | 0.27 (0.22-0.32)                               | 0.04                                          | 0.12 (0.09-0.15) | 0.26 (0.20-0.33) | 0.53 (0.34-0.72) | 7.97  |
| Smoking                           |                                                |                                               |                  |                  |                  |       |
| Never smoker                      | 0.27 (0.24-0.30)                               | 0.02                                          | 0.11 (0.09-0.13) | 0.24 (0.21-0.27) | 0.53 (0.46-0.61) | 75.24 |

|                              |                  |      |                  |                  |                  |       |
|------------------------------|------------------|------|------------------|------------------|------------------|-------|
| Ever smoker                  | 0.31 (0.28-0.35) | 0.02 | 0.15 (0.12-0.18) | 0.29 (0.25-0.33) | 0.56 (0.50-0.62) | 43.62 |
| Current smoker               | 0.28 (0.26-0.32) | 0.02 | 0.13 (0.11-0.15) | 0.26 (0.23-0.29) | 0.51 (0.40-0.62) | 25.96 |
| Alcohol drinking             |                  |      |                  |                  |                  |       |
| Non-drinker                  | 0.29 (0.26-0.31) | 0.02 | 0.12 (0.10-0.14) | 0.26 (0.23-0.29) | 0.54 (0.47-0.62) | 75.24 |
| Moderate drinking            | 0.28 (0.23-0.35) | 0.02 | 0.12 (0.09-0.15) | 0.28 (0.19-0.36) | 0.60 (0.37-0.83) | 22.39 |
| Heavy drinking               | 0.27 (0.25-0.30) | 0.02 | 0.14 (0.12-0.16) | 0.25 (0.22-0.28) | 0.49 (0.43-0.56) | 15.46 |
| Missing                      | 0.29 (0.20-0.43) | 0.02 | 0.12 (0.05-0.19) | 0.25 (0.12-0.38) | 0.53 (0.20-0.87) | 23.28 |
| Physical activity categories |                  |      |                  |                  |                  |       |
| Below                        | 0.30 (0.27-0.33) | 0.02 | 0.13 (0.11-0.15) | 0.27 (0.24-0.31) | 0.54 (0.43-0.64) | 32.33 |
| Meet                         | 0.25 (0.20-0.31) | 0.02 | 0.11 (0.07-0.14) | 0.22 (0.18-0.27) | 0.43 (0.28-0.58) | 75.24 |
| Exceed                       | 0.28 (0.25-0.31) | 0.02 | 0.12 (0.10-0.14) | 0.26 (0.23-0.29) | 0.55 (0.48-0.63) | 27.6  |
| BMI categories               |                  |      |                  |                  |                  |       |
| <25 kg/m <sup>2</sup>        | 0.30 (0.28-0.34) | 0.02 | 0.13 (0.12-0.15) | 0.28 (0.24-0.32) | 0.56 (0.47-0.65) | 32.33 |
| 25-29.9 kg/m <sup>2</sup>    | 0.25 (0.22-0.28) | 0.02 | 0.10 (0.08-0.13) | 0.24 (0.20-0.28) | 0.46 (0.36-0.56) | 43.62 |
| ≥30 kg/m <sup>2</sup>        | 0.29 (0.27-0.32) | 0.02 | 0.13 (0.11-0.16) | 0.26 (0.23-0.29) | 0.55 (0.45-0.65) | 75.24 |
| Missing                      | 0.33 (0.24-0.46) | 0.02 | 0.15 (0.09-0.21) | 0.26 (0.09-0.43) | 0.64 (0.01-1.27) | 9.32  |
